# Supplementary material
Source: Springer Nature journal article supplement (https://www.springermedizin.de/resource/supplementary/12891_2007_472_MOESM10_ESM.pdf/9511512)

# VAS

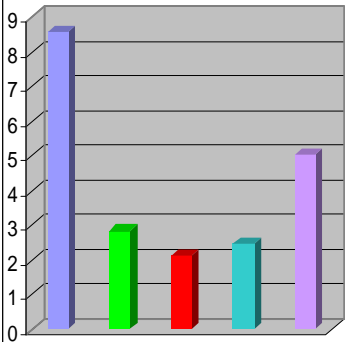

- before surgery 8.60
- 1 month after 2.84
- 3 months after 2.12
- 6 months after 2.45
- 12 months after 5.00

Supplement: MOESM10 [file 9511512]
